# Supplementary material
Source: PubMed Central journal article supplement (PMC9950293)
Supplement: NIHMS1829236-supplement-1.pdf [file NIHMS1829236-supplement-1.pdf]

**Table S1.** Cropland Data Layer (CDL) codes corresponding to cultivated land in Idaho included in CropScape analysis<sup>1</sup>

| <b>Code</b> | <b>Crop</b>                | <b>Code</b> | <b>Crop</b>  |
|-------------|----------------------------|-------------|--------------|
| 1           | Corn                       | 55          | Cranberries  |
| 2           | Cotton                     | 56          | Hops         |
| 3           | Rice                       | 57          | Herbs        |
| 4           | Sorghum                    | 58          | Clover       |
| 5           | Soybeans                   | 66          | Cherries     |
| 6           | Sunflower                  | 68          | Apples       |
| 10          | Peanuts                    | 69          | Grapes       |
| 11          | To bacco                   | 72          | Citrus       |
| 12          | Sweet Corn                 | 74          | Pecans       |
| 13          | Popcorn/Ornamental Corn    | 75          | Almonds      |
| 14          | Mint                       | 76          | Walnuts      |
| 21          | Barley                     | 77          | Pears        |
| 22          | Durum wheat                | 204         | Pistachios   |
| 23          | Spring wheat               | 206         | Carrots      |
| 24          | Winter wheat               | 208         | Garlic       |
| 25          | Other small grains         | 209         | Cantaloupe   |
| 28          | Rye                        | 210         | Prunes       |
| 29          | Oats                       | 211         | Olives       |
| 29          | Millet                     | 212         | Oranges      |
| 30          | Speltz                     | 213         | Honeydew     |
| 31          | Canola                     | 214         | Broccoli     |
| 32          | Flaxseed                   | 215         | Avocado      |
| 33          | Safflower                  | 216         | Peppers      |
| 34          | Rape Seed                  | 217         | Pomegranate  |
| 35          | Mustard                    | 218         | Nectarines   |
| 36          | Alfalfa                    | 219         | Greens       |
| 41          | Sugarbeets                 | 220         | Plums        |
| 42          | Dry beans                  | 221         | Strawberries |
| 43          | Potatoes                   | 222         | Squash       |
| 44          | Other crops                | 223         | Apricots     |
| 45          | Sugarcane                  | 242         | Blueberries  |
| 46          | Sweet potatoes             | 243         | Cabbage      |
| 47          | Misc vegetables and fruits | 244         | Cauliflower  |
| 48          | Watermelons                | 245         | Celery       |
| 49          | Onions                     | 246         | Radishes     |
| 50          | Cucumbers                  | 247         | Turnips      |
| 51          | Chickpeas                  | 248         | Eggplants    |
| 52          | Lentils                    | 249         | Gourds       |
| 53          | Peas                       | 250         | Cranberries  |
| 54          | Tomatoes                   | 205         | Triticale    |

<sup>1</sup>Obtained from [https://www.nass.usda.gov/Research and Science/Cropland/metadata/2020\\_cultivated\\_layer\\_metadata.htm](https://www.nass.usda.gov/Research_and_Science/Cropland/metadata/2020_cultivated_layer_metadata.htm)

**Table S2.** Sensitivity and specificity in pixels of cultivated and non-cultivated land within 0.5 km of each participant-home between ground-truthing and satellite-derived estimates from sensitivity analysis in which inaccessible fields were removed from the analysis

| Method                             | Overall agreement <sup>1</sup><br>(%) | Sensitivity (%) | Specificity (%) |
|------------------------------------|---------------------------------------|-----------------|-----------------|
| CropScape                          | 89.3                                  | 82.2            | 90.0            |
| NLCD Crop                          | 89.6                                  | 82.8            | 90.2            |
| Landsat-derived NDVI <sub>75</sub> | 57.5                                  | 83.3            | 55.2            |
| Landsat-derived NDVI <sub>90</sub> | 76.0                                  | 59.3            | 77.5            |

<sup>1</sup>Overall agreement in pixels designated as cultivated crops vs. non-cultivated area

**Table S3.** Sensitivity and specificity in pixels of cultivated crops and non-cultivated land within 0.5 km of each participant-home between ground-truthing and combinations of satellite-derived estimates from sensitivity analysis in which inaccessible fields were removed from the analysis

| Method                                                        | Overall agreement <sup>1</sup><br>(%) | Sensitivity (%) | Specificity (%) |
|---------------------------------------------------------------|---------------------------------------|-----------------|-----------------|
| CropScape or NLCD Crop <sup>2</sup>                           | 87.1                                  | 93.5            | 74.4            |
| CropScape or Landsat-derived NDVI <sub>90</sub> <sup>2</sup>  | 52.9                                  | 95.6            | 69.9            |
| CropScape or Landsat-derived NDVI <sub>90</sub> <sup>2</sup>  | 71.6                                  | 90.9            | 50.7            |
| NLCD Crop or Landsat <sub>75</sub> <sup>2</sup>               | 53.1                                  | 96.1            | 69.9            |
| NLCD Crop or Landsat <sub>90</sub> <sup>2</sup>               | 71.8                                  | 90.9            | 51.2            |
| CropScape and NLCD Crop <sup>3</sup>                          | 91.9                                  | 86.7            | 93.4            |
| CropScape and Landsat-derived NDVI <sub>75</sub> <sup>3</sup> | 93.9                                  | 49.1            | 96.0            |
| CropScape and Landsat-derived <sub>90</sub> <sup>3</sup>      | 93.8                                  | 69.9            | 97.6            |
| NLCD Crop and Landsat <sub>75</sub> <sup>3</sup>              | 94.0                                  | 49.3            | 96.1            |
| NLCD Crop and Landsat <sub>90</sub> <sup>3</sup>              | 93.8                                  | 80.2            | 97.5            |

<sup>1</sup>Overall agreement in area designated as cultivated crops vs. non-cultivated area

<sup>2</sup>Area considered cultivated land if *either* comparison method designated it as cultivated land

<sup>3</sup>Area considered cultivated land if *both* comparison methods designated it as cultivated land

Figure S1. NDVI Values for Western Idaho

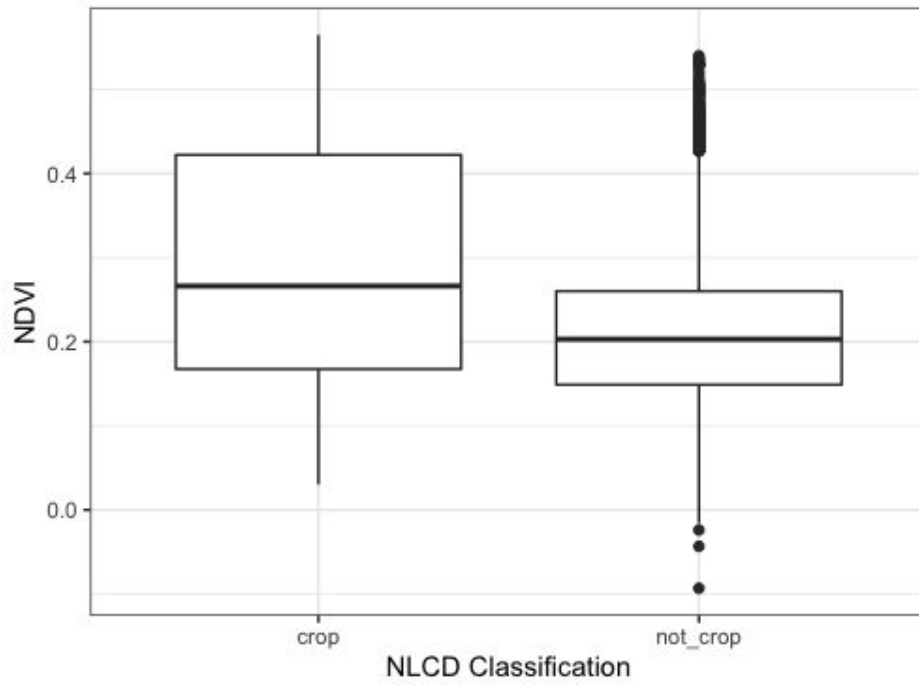

Figure S2. NDVI Values for Southern Idaho

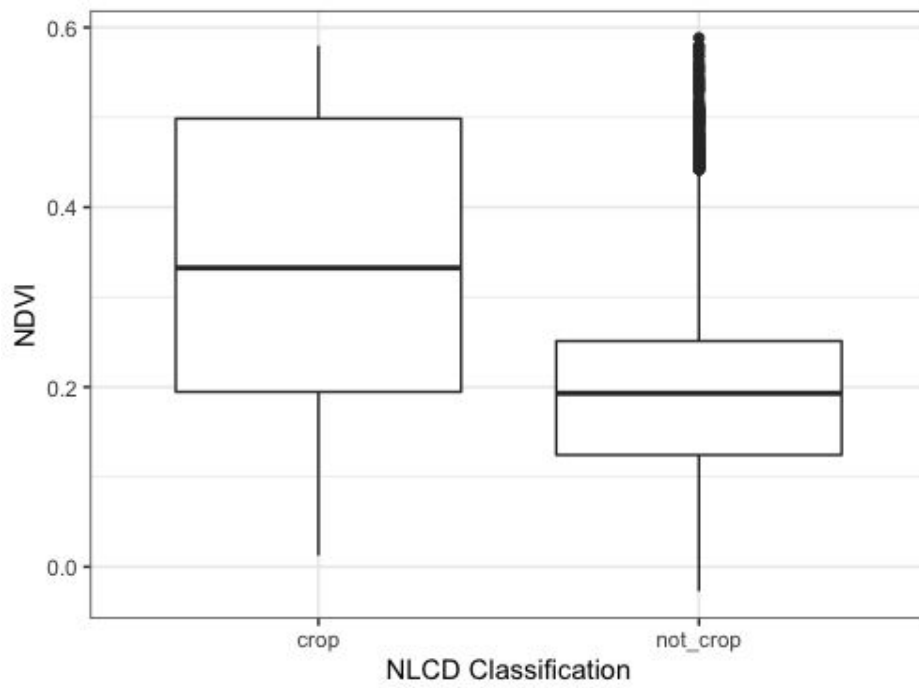

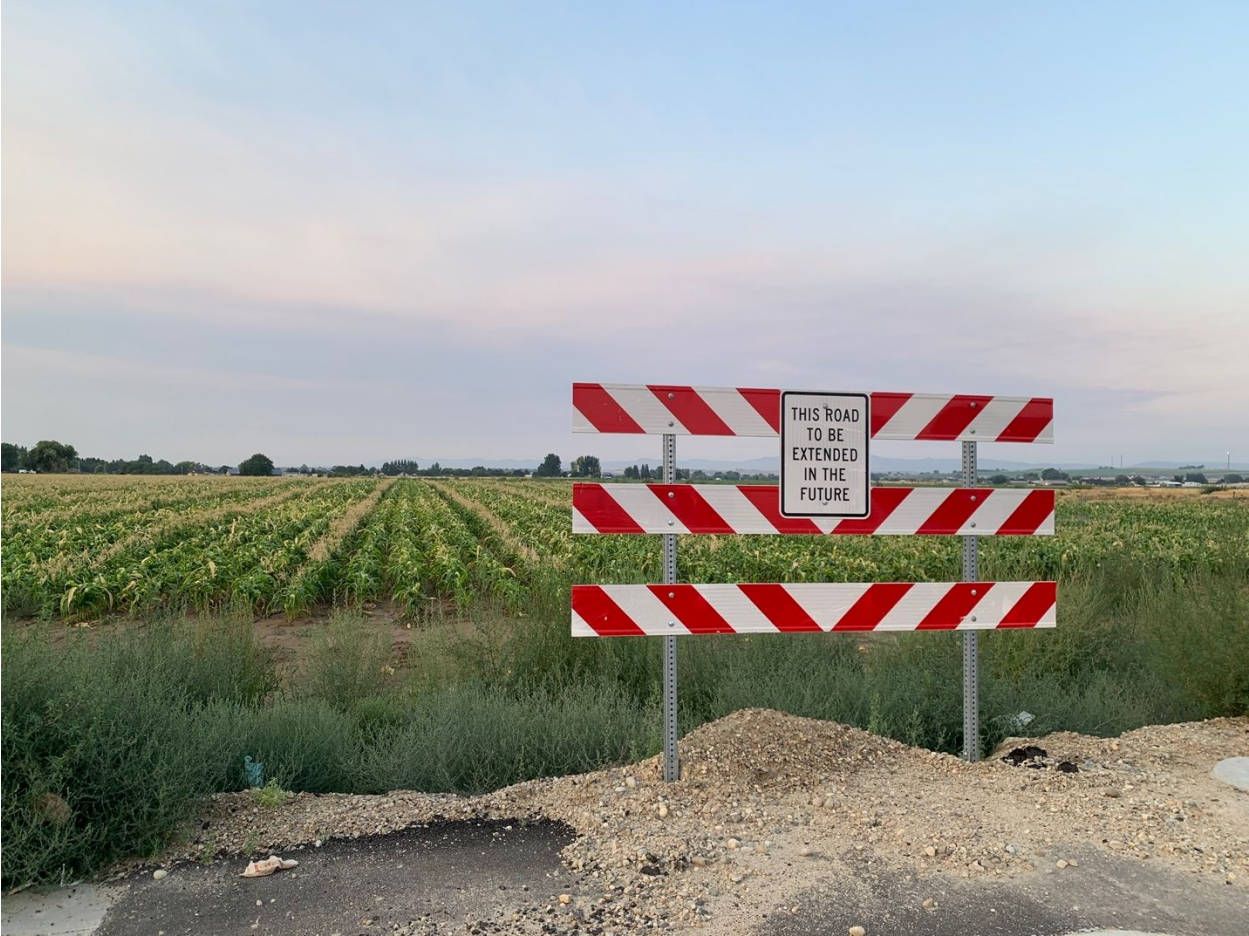

Figure S3. Example of increasing urbanization near one participant's home
